# Supplementary material for: Surgical stabilization of multiple rib fractures in an Asian population: a systematic review and meta-analysis
Source: PubMed Central journal article supplement — J Thorac Dis. 2023 Sep 18;15(9):4961–75. doi: 10.21037/jtd-23-1117 (PMC10586968; doi:10.21037/jtd-23-1117), 2023-09-18
Supplement: jtd-15-09-4961-coif.pdf [file jtd-15-09-4961-coif.pdf]

## ICMJE DISCLOSURE FORM

Date: 2023/7/11

Your Name: Weiwei HE

Manuscript Title: Surgical stabilization of multiple rib fractures in an Asian population: a systematic literature review and meta-analysis

Manuscript number (if known): \_\_\_\_\_

In the interest of transparency, we ask you to disclose all relationships/activities/interests listed below that are related to the content of your manuscript. "Related" means any relation with for-profit or not-for-profit third parties whose interests may be affected by the content of the manuscript. Disclosure represents a commitment to transparency and does not necessarily indicate a bias. If you are in doubt about whether to list a relationship/activity/interest, it is preferable that you do so.

The following questions apply to the author's relationships/activities/interests as they relate to the **current manuscript only**.

The author's relationships/activities/interests should be **defined broadly**. For example, if your manuscript pertains to the epidemiology of hypertension, you should declare all relationships with manufacturers of antihypertensive medication, even if that medication is not mentioned in the manuscript.

In item #1 below, report all support for the work reported in this manuscript without time limit. For all other items, the time frame for disclosure is the past 36 months.

|                                                           |                                                                                                                                                                                | Name all entities with whom you have this relationship or indicate none (add rows as needed)                   | Specifications/Comments (e.g., if payments were made to you or to your institution) |
|-----------------------------------------------------------|--------------------------------------------------------------------------------------------------------------------------------------------------------------------------------|----------------------------------------------------------------------------------------------------------------|-------------------------------------------------------------------------------------|
| <b>Time frame: Since the initial planning of the work</b> |                                                                                                                                                                                |                                                                                                                |                                                                                     |
| 1                                                         | All support for the present manuscript (e.g., funding, provision of study materials, medical writing, article processing charges, etc.)<br><b>No time limit for this item.</b> | This study was funded by Johnson & Johnson (JnJ) for the conduct of literature search and statistical analysis | Payments were made to ClinChoice Inc. where Raymark and Stephen are employed.       |
|                                                           |                                                                                                                                                                                |                                                                                                                |                                                                                     |
|                                                           |                                                                                                                                                                                |                                                                                                                |                                                                                     |
|                                                           |                                                                                                                                                                                |                                                                                                                |                                                                                     |
|                                                           |                                                                                                                                                                                |                                                                                                                |                                                                                     |
| <b>Time frame: past 36 months</b>                         |                                                                                                                                                                                |                                                                                                                |                                                                                     |
| 2                                                         | Grants or contracts from any entity (if not indicated in item #1 above).                                                                                                       | <input checked="" type="checkbox"/> None                                                                       |                                                                                     |
|                                                           |                                                                                                                                                                                |                                                                                                                |                                                                                     |
| 3                                                         | Royalties or licenses                                                                                                                                                          | <input checked="" type="checkbox"/> None                                                                       |                                                                                     |
|                                                           |                                                                                                                                                                                |                                                                                                                |                                                                                     |
|                                                           |                                                                                                                                                                                |                                                                                                                |                                                                                     |

|    |                                                                                                              |                                                                 |  |
|----|--------------------------------------------------------------------------------------------------------------|-----------------------------------------------------------------|--|
| 4  | Consulting fees                                                                                              | <input type="checkbox"/> <u>X</u> <input type="checkbox"/> None |  |
|    |                                                                                                              |                                                                 |  |
|    |                                                                                                              |                                                                 |  |
| 5  | Payment or honoraria for lectures, presentations, speakers bureaus, manuscript writing or educational events | <input type="checkbox"/> <u>X</u> <input type="checkbox"/> None |  |
|    |                                                                                                              |                                                                 |  |
|    |                                                                                                              |                                                                 |  |
| 6  | Payment for expert testimony                                                                                 | <input type="checkbox"/> <u>X</u> <input type="checkbox"/> None |  |
|    |                                                                                                              |                                                                 |  |
|    |                                                                                                              |                                                                 |  |
| 7  | Support for attending meetings and/or travel                                                                 | <input type="checkbox"/> <u>X</u> <input type="checkbox"/> None |  |
|    |                                                                                                              |                                                                 |  |
|    |                                                                                                              |                                                                 |  |
| 8  | Patents planned, issued or pending                                                                           | <input type="checkbox"/> <u>X</u> <input type="checkbox"/> None |  |
|    |                                                                                                              |                                                                 |  |
|    |                                                                                                              |                                                                 |  |
| 9  | Participation on a Data Safety Monitoring Board or Advisory Board                                            | <input type="checkbox"/> <u>X</u> <input type="checkbox"/> None |  |
|    |                                                                                                              |                                                                 |  |
|    |                                                                                                              |                                                                 |  |
| 10 | Leadership or fiduciary role in other board, society, committee or advocacy group, paid or unpaid            | <input type="checkbox"/> <u>X</u> <input type="checkbox"/> None |  |
|    |                                                                                                              |                                                                 |  |
|    |                                                                                                              |                                                                 |  |
| 11 | Stock or stock options                                                                                       | <input type="checkbox"/> <u>X</u> <input type="checkbox"/> None |  |
|    |                                                                                                              |                                                                 |  |
|    |                                                                                                              |                                                                 |  |
| 12 | Receipt of equipment, materials, drugs, medical writing, gifts or other services                             | <input type="checkbox"/> <u>X</u> <input type="checkbox"/> None |  |
|    |                                                                                                              |                                                                 |  |
|    |                                                                                                              |                                                                 |  |
| 13 | Other financial or non-financial interests                                                                   | <input type="checkbox"/> <u>X</u> <input type="checkbox"/> None |  |
|    |                                                                                                              |                                                                 |  |
|    |                                                                                                              |                                                                 |  |

**Please summarize the above conflict of interest in the following box:**

This study was funded by Johnson & Johnson (JnJ) for the conduct of literature search and statistical analysis, and payments were made to ClinChoice Inc.

**Please place an “X” next to the following statement to indicate your agreement:**

I certify that I have answered every question and have not altered the wording of any of the questions on this form.

## ICMJE DISCLOSURE FORM

Date: 2023/7/11

Your Name: Yi Yang

Manuscript Title: Surgical stabilization of multiple rib fractures in an Asian population: a systematic literature review and meta-analysis

Manuscript number (if known): \_\_\_\_\_

In the interest of transparency, we ask you to disclose all relationships/activities/interests listed below that are related to the content of your manuscript. "Related" means any relation with for-profit or not-for-profit third parties whose interests may be affected by the content of the manuscript. Disclosure represents a commitment to transparency and does not necessarily indicate a bias. If you are in doubt about whether to list a relationship/activity/interest, it is preferable that you do so.

The following questions apply to the author's relationships/activities/interests as they relate to the **current manuscript only**.

The author's relationships/activities/interests should be **defined broadly**. For example, if your manuscript pertains to the epidemiology of hypertension, you should declare all relationships with manufacturers of antihypertensive medication, even if that medication is not mentioned in the manuscript.

In item #1 below, report all support for the work reported in this manuscript without time limit. For all other items, the time frame for disclosure is the past 36 months.

|                                                           |                                                                                                                                                                                | Name all entities with whom you have this relationship or indicate none (add rows as needed)                   | Specifications/Comments (e.g., if payments were made to you or to your institution) |
|-----------------------------------------------------------|--------------------------------------------------------------------------------------------------------------------------------------------------------------------------------|----------------------------------------------------------------------------------------------------------------|-------------------------------------------------------------------------------------|
| <b>Time frame: Since the initial planning of the work</b> |                                                                                                                                                                                |                                                                                                                |                                                                                     |
| 1                                                         | All support for the present manuscript (e.g., funding, provision of study materials, medical writing, article processing charges, etc.)<br><b>No time limit for this item.</b> | This study was funded by Johnson & Johnson (JnJ) for the conduct of literature search and statistical analysis | Payments were made to ClinChoice Inc. where Raymark and Stephen are employed.       |
|                                                           |                                                                                                                                                                                |                                                                                                                |                                                                                     |
|                                                           |                                                                                                                                                                                |                                                                                                                |                                                                                     |
|                                                           |                                                                                                                                                                                |                                                                                                                |                                                                                     |
|                                                           |                                                                                                                                                                                |                                                                                                                |                                                                                     |
| <b>Time frame: past 36 months</b>                         |                                                                                                                                                                                |                                                                                                                |                                                                                     |
| 2                                                         | Grants or contracts from any entity (if not indicated in item #1 above).                                                                                                       | <input checked="" type="checkbox"/> None                                                                       |                                                                                     |
|                                                           |                                                                                                                                                                                |                                                                                                                |                                                                                     |
| 3                                                         | Royalties or licenses                                                                                                                                                          | <input checked="" type="checkbox"/> None                                                                       |                                                                                     |
|                                                           |                                                                                                                                                                                |                                                                                                                |                                                                                     |
| 4                                                         | Consulting fees                                                                                                                                                                | <input checked="" type="checkbox"/> None                                                                       |                                                                                     |

|    |                                                                                                              |                                          |  |
|----|--------------------------------------------------------------------------------------------------------------|------------------------------------------|--|
|    |                                                                                                              |                                          |  |
| 5  | Payment or honoraria for lectures, presentations, speakers bureaus, manuscript writing or educational events | <input checked="" type="checkbox"/> None |  |
| 6  | Payment for expert testimony                                                                                 | <input checked="" type="checkbox"/> None |  |
| 7  | Support for attending meetings and/or travel                                                                 | <input checked="" type="checkbox"/> None |  |
| 8  | Patents planned, issued or pending                                                                           | <input checked="" type="checkbox"/> None |  |
| 9  | Participation on a Data Safety Monitoring Board or Advisory Board                                            | <input checked="" type="checkbox"/> None |  |
| 10 | Leadership or fiduciary role in other board, society, committee or advocacy group, paid or unpaid            | <input checked="" type="checkbox"/> None |  |
| 11 | Stock or stock options                                                                                       | <input checked="" type="checkbox"/> None |  |
| 12 | Receipt of equipment, materials, drugs, medical writing, gifts or other services                             | <input checked="" type="checkbox"/> None |  |
| 13 | Other financial or non-financial interests                                                                   | <input checked="" type="checkbox"/> None |  |

**Please summarize the above conflict of interest in the following box:**

This study was funded by Johnson & Johnson (JnJ) for the conduct of literature search and statistical analysis, and payments were made to ClinChoice Inc..

**Please place an "X" next to the following statement to indicate your agreement:**

I certify that I have answered every question and have not altered the wording of any of the questions on this form.

## ICMJE DISCLOSURE FORM

Date: 2023/07/11  
 Your Name: Raymark Salonga  
 Manuscript Title: Surgical stabilization of multiple rib fractures in an Asian population: a systematic literature review and meta-analysis  
 Manuscript number (if known): \_\_\_\_\_

In the interest of transparency, we ask you to disclose all relationships/activities/interests listed below that are related to the content of your manuscript. "Related" means any relation with for-profit or not-for-profit third parties whose interests may be affected by the content of the manuscript. Disclosure represents a commitment to transparency and does not necessarily indicate a bias. If you are in doubt about whether to list a relationship/activity/interest, it is preferable that you do so.

The following questions apply to the author's relationships/activities/interests as they relate to the **current manuscript only**.

The author's relationships/activities/interests should be **defined broadly**. For example, if your manuscript pertains to the epidemiology of hypertension, you should declare all relationships with manufacturers of antihypertensive medication, even if that medication is not mentioned in the manuscript.

In item #1 below, report all support for the work reported in this manuscript without time limit. For all other items, the time frame for disclosure is the past 36 months.

|                                                           |                                                                                                                                                                                | Name all entities with whom you have this relationship or indicate none (add rows as needed)                   | Specifications/Comments (e.g., if payments were made to you or to your institution) |
|-----------------------------------------------------------|--------------------------------------------------------------------------------------------------------------------------------------------------------------------------------|----------------------------------------------------------------------------------------------------------------|-------------------------------------------------------------------------------------|
| <b>Time frame: Since the initial planning of the work</b> |                                                                                                                                                                                |                                                                                                                |                                                                                     |
| 1                                                         | All support for the present manuscript (e.g., funding, provision of study materials, medical writing, article processing charges, etc.)<br><b>No time limit for this item.</b> | This study was funded by Johnson & Johnson (JnJ) for the conduct of literature search and statistical analysis | Payments were made to my institution                                                |
|                                                           |                                                                                                                                                                                |                                                                                                                |                                                                                     |
|                                                           |                                                                                                                                                                                |                                                                                                                |                                                                                     |
|                                                           |                                                                                                                                                                                |                                                                                                                |                                                                                     |
|                                                           |                                                                                                                                                                                |                                                                                                                |                                                                                     |
| <b>Time frame: past 36 months</b>                         |                                                                                                                                                                                |                                                                                                                |                                                                                     |
| 2                                                         | Grants or contracts from any entity (if not indicated in item #1 above).                                                                                                       | <input checked="" type="checkbox"/> None                                                                       |                                                                                     |
|                                                           |                                                                                                                                                                                |                                                                                                                |                                                                                     |
| 3                                                         | Royalties or licenses                                                                                                                                                          | <input checked="" type="checkbox"/> None                                                                       |                                                                                     |
|                                                           |                                                                                                                                                                                |                                                                                                                |                                                                                     |
| 4                                                         | Consulting fees                                                                                                                                                                | <input checked="" type="checkbox"/> None                                                                       |                                                                                     |

|    |                                                                                                              |                                                                                           |  |
|----|--------------------------------------------------------------------------------------------------------------|-------------------------------------------------------------------------------------------|--|
|    |                                                                                                              |                                                                                           |  |
| 5  | Payment or honoraria for lectures, presentations, speakers bureaus, manuscript writing or educational events | <input checked="" type="checkbox"/> None                                                  |  |
| 6  | Payment for expert testimony                                                                                 | <input checked="" type="checkbox"/> None                                                  |  |
| 7  | Support for attending meetings and/or travel                                                                 | <input checked="" type="checkbox"/> None                                                  |  |
| 8  | Patents planned, issued or pending                                                                           | <input checked="" type="checkbox"/> None                                                  |  |
| 9  | Participation on a Data Safety Monitoring Board or Advisory Board                                            | <input checked="" type="checkbox"/> None                                                  |  |
| 10 | Leadership or fiduciary role in other board, society, committee or advocacy group, paid or unpaid            | <input checked="" type="checkbox"/> None                                                  |  |
| 11 | Stock or stock options                                                                                       | <input checked="" type="checkbox"/> None                                                  |  |
| 12 | Receipt of equipment, materials, drugs, medical writing, gifts or other services                             | <input checked="" type="checkbox"/> None                                                  |  |
| 13 | Other financial or non-financial interests                                                                   | Raymark was working with ClinChoice Inc. as a contractor to JnJ at the time of the study. |  |

**Please summarize the above conflict of interest in the following box:**

This study was funded by Johnson & Johnson (JnJ) for the conduct of literature search and statistical analysis, and payments were made to ClinChoice Inc.; Raymark was working with ClinChoice Inc. as a contractor to JnJ at the time of the study.

**Please place an “X” next to the following statement to indicate your agreement:**

I certify that I have answered every question and have not altered the wording of any of the questions on this form.

## ICMJE DISCLOSURE FORM

Date: 2023/7/11

Your Name: Ledford Powell

Manuscript Title: Surgical stabilization of multiple rib fractures in an Asian population: a systematic literature review and meta-analysis

Manuscript number (if known): \_\_\_\_\_

In the interest of transparency, we ask you to disclose all relationships/activities/interests listed below that are related to the content of your manuscript. "Related" means any relation with for-profit or not-for-profit third parties whose interests may be affected by the content of the manuscript. Disclosure represents a commitment to transparency and does not necessarily indicate a bias. If you are in doubt about whether to list a relationship/activity/interest, it is preferable that you do so.

The following questions apply to the author's relationships/activities/interests as they relate to the current manuscript only.

The author's relationships/activities/interests should be defined broadly. For example, if your manuscript pertains to the epidemiology of hypertension, you should declare all relationships with manufacturers of antihypertensive medication, even if that medication is not mentioned in the manuscript.

In item #1 below, report all support for the work reported in this manuscript without time limit. For all other items, the time frame for disclosure is the past 36 months.

|                                                           |                                                                                                                                                                                | Name all entities with whom you have this relationship or indicate none (add rows as needed)                   | Specifications/Comments (e.g., if payments were made to you or to your institution) |
|-----------------------------------------------------------|--------------------------------------------------------------------------------------------------------------------------------------------------------------------------------|----------------------------------------------------------------------------------------------------------------|-------------------------------------------------------------------------------------|
| <b>Time frame: Since the initial planning of the work</b> |                                                                                                                                                                                |                                                                                                                |                                                                                     |
| 1                                                         | All support for the present manuscript (e.g., funding, provision of study materials, medical writing, article processing charges, etc.)<br><b>No time limit for this item.</b> | This study was funded by Johnson & Johnson (JnJ) for the conduct of literature search and statistical analysis | Payments were made to ClinChoice Inc. where Raymark and Stephen are employed.       |
|                                                           |                                                                                                                                                                                |                                                                                                                |                                                                                     |
|                                                           |                                                                                                                                                                                |                                                                                                                |                                                                                     |
|                                                           |                                                                                                                                                                                |                                                                                                                |                                                                                     |
|                                                           |                                                                                                                                                                                |                                                                                                                |                                                                                     |
| <b>Time frame: past 36 months</b>                         |                                                                                                                                                                                |                                                                                                                |                                                                                     |
| 2                                                         | Grants or contracts from any entity (if not indicated in item #1 above).                                                                                                       | <input checked="" type="checkbox"/> None                                                                       |                                                                                     |
|                                                           |                                                                                                                                                                                |                                                                                                                |                                                                                     |
| 3                                                         | Royalties or licenses                                                                                                                                                          | <input checked="" type="checkbox"/> None                                                                       |                                                                                     |
|                                                           |                                                                                                                                                                                |                                                                                                                |                                                                                     |
| 4                                                         | Consulting fees                                                                                                                                                                | <input checked="" type="checkbox"/> None                                                                       |                                                                                     |

|    |                                                                                                              |                                          |  |
|----|--------------------------------------------------------------------------------------------------------------|------------------------------------------|--|
|    |                                                                                                              |                                          |  |
| 5  | Payment or honoraria for lectures, presentations, speakers bureaus, manuscript writing or educational events | <input checked="" type="checkbox"/> None |  |
| 6  | Payment for expert testimony                                                                                 | <input checked="" type="checkbox"/> None |  |
| 7  | Support for attending meetings and/or travel                                                                 | <input checked="" type="checkbox"/> None |  |
| 8  | Patents planned, issued or pending                                                                           | <input checked="" type="checkbox"/> None |  |
| 9  | Participation on a Data Safety Monitoring Board or Advisory Board                                            | <input checked="" type="checkbox"/> None |  |
| 10 | Leadership or fiduciary role in other board, society, committee or advocacy group, paid or unpaid            | <input checked="" type="checkbox"/> None |  |
| 11 | Stock or stock options                                                                                       | <input checked="" type="checkbox"/> None |  |
| 12 | Receipt of equipment, materials, drugs, medical writing, gifts or other services                             | <input checked="" type="checkbox"/> None |  |
| 13 | Other financial or non-financial interests                                                                   | <input checked="" type="checkbox"/> None |  |

**Please summarize the above conflict of interest in the following box:**

This study was funded by Johnson & Johnson (JnJ) for the conduct of literature search and statistical analysis, and payments were made to ClinChoice Inc.

**Please place an "X" next to the following statement to indicate your agreement:**

I certify that I have answered every question and have not altered the wording of any of the questions on this form.



## ICMJE DISCLOSURE FORM

Date: June 20, 2023

Your Name: Patrick Greiffenstein, MD

Manuscript Title: Surgical Stabilization of Multiple Rib Fractures in an Asian Population: A Systematic Literature Review and Meta-Analysis

Manuscript number (if known): \_\_\_\_\_

In the interest of transparency, we ask you to disclose all relationships/activities/interests listed below that are related to the content of your manuscript. "Related" means any relation with for-profit or not-for-profit third parties whose interests may be affected by the content of the manuscript. Disclosure represents a commitment to transparency and does not necessarily indicate a bias. If you are in doubt about whether to list a relationship/activity/interest, it is preferable that you do so.

The following questions apply to the author's relationships/activities/interests as they relate to the current manuscript only.

The author's relationships/activities/interests should be defined broadly. For example, if your manuscript pertains to the epidemiology of hypertension, you should declare all relationships with manufacturers of antihypertensive medication, even if that medication is not mentioned in the manuscript.

In item #1 below, report all support for the work reported in this manuscript without time limit. For all other items, the time frame for disclosure is the past 36 months.

|                                                           |                                                                                                                                                                                | Name all entities with whom you have this relationship or indicate none (add rows as needed)                   | Specifications/Comments (e.g., if payments were made to you or to your institution) |
|-----------------------------------------------------------|--------------------------------------------------------------------------------------------------------------------------------------------------------------------------------|----------------------------------------------------------------------------------------------------------------|-------------------------------------------------------------------------------------|
| <b>Time frame: Since the initial planning of the work</b> |                                                                                                                                                                                |                                                                                                                |                                                                                     |
| 1                                                         | All support for the present manuscript (e.g., funding, provision of study materials, medical writing, article processing charges, etc.)<br><b>No time limit for this item.</b> | This study was funded by Johnson & Johnson (JnJ) for the conduct of literature search and statistical analysis | Payments were made to ClinChoice Inc. where Raymark and Stephen are employed.       |
|                                                           |                                                                                                                                                                                |                                                                                                                |                                                                                     |
|                                                           |                                                                                                                                                                                |                                                                                                                |                                                                                     |
|                                                           |                                                                                                                                                                                |                                                                                                                |                                                                                     |
|                                                           |                                                                                                                                                                                |                                                                                                                |                                                                                     |
| <b>Time frame: past 36 months</b>                         |                                                                                                                                                                                |                                                                                                                |                                                                                     |
| 2                                                         | Grants or contracts from any entity (if not indicated in item #1 above).                                                                                                       | <input checked="" type="checkbox"/> None                                                                       |                                                                                     |
|                                                           |                                                                                                                                                                                |                                                                                                                |                                                                                     |
| 3                                                         | Royalties or licenses                                                                                                                                                          | <input checked="" type="checkbox"/> None                                                                       |                                                                                     |
|                                                           |                                                                                                                                                                                |                                                                                                                |                                                                                     |
| 4                                                         | Consulting fees                                                                                                                                                                | <input checked="" type="checkbox"/> None                                                                       |                                                                                     |
|                                                           |                                                                                                                                                                                |                                                                                                                |                                                                                     |

|    |                                                                                                              |                                          |                                                                                          |
|----|--------------------------------------------------------------------------------------------------------------|------------------------------------------|------------------------------------------------------------------------------------------|
| 5  | Payment or honoraria for lectures, presentations, speakers bureaus, manuscript writing or educational events | Zimmer Biomet<br>DePuy Synthes           | Paid instructor for skills lab, consultant<br>Paid instructor for skills lab, consultant |
| 6  | Payment for expert testimony                                                                                 | <input checked="" type="checkbox"/> None |                                                                                          |
| 7  | Support for attending meetings and/or travel                                                                 | <input type="checkbox"/> None            |                                                                                          |
| 8  | Patents planned, issued or pending                                                                           | <input type="checkbox"/> None            |                                                                                          |
| 9  | Participation on a Data Safety Monitoring Board or Advisory Board                                            | <input type="checkbox"/> None            |                                                                                          |
| 10 | Leadership or fiduciary role in other board, society, committee or advocacy group, paid or unpaid            | <input type="checkbox"/> None            |                                                                                          |
| 11 | Stock or stock options                                                                                       | <input type="checkbox"/> None            |                                                                                          |
| 12 | Receipt of equipment, materials, drugs, medical writing, gifts or other services                             | <input type="checkbox"/> None            |                                                                                          |
| 13 | Other financial or non-financial interests                                                                   | <input type="checkbox"/> None            |                                                                                          |

**Please summarize the above conflict of interest in the following box:**

I am paid honoraria for conducting training sessions (using cadavers) for two different device manufacturing companies, Zimmer Biomet and DePuy Synthes. Here, I lecture on the indications and contraindications of the procedure and instruct how to perform rib fixation on cadavers using the provided devices and techniques. I perform this role two to three times per year in total.

This study was funded by Johnson & Johnson (JnJ) for the conduct of literature search and statistical analysis, and payments were made to ClinChoice Inc.

**Please place an "X" next to the following statement to indicate your agreement:**

I certify that I have answered every question and have not altered the wording of any of the questions on this form.

## ICMJE DISCLOSURE FORM

**Date:** June 13<sup>th</sup>, 2023

**Your Name:** Jonne Thomas Hendrik Prins

**Manuscript Title:** Surgical Stabilization of Multiple Rib Fractures in an Asian Population: A Systematic Literature Review and Meta-Analysis

**Manuscript number (if known):-**

In the interest of transparency, we ask you to disclose all relationships/activities/interests listed below that are related to the content of your manuscript. "Related" means any relation with for-profit or not-for-profit third parties whose interests may be affected by the content of the manuscript. Disclosure represents a commitment to transparency and does not necessarily indicate a bias. If you are in doubt about whether to list a relationship/activity/interest, it is preferable that you do so.

The following questions apply to the author's relationships/activities/interests as they relate to the current manuscript only.

The author's relationships/activities/interests should be defined broadly. For example, if your manuscript pertains to the epidemiology of hypertension, you should declare all relationships with manufacturers of antihypertensive medication, even if that medication is not mentioned in the manuscript.

In item #1 below, report all support for the work reported in this manuscript without time limit. For all other items, the time frame for disclosure is the past 36 months.

|                                                           |                                                                                                                                                                                | Name all entities with whom you have this relationship or indicate none (add rows as needed)                   | Specifications/Comments (e.g., if payments were made to you or to your institution) |
|-----------------------------------------------------------|--------------------------------------------------------------------------------------------------------------------------------------------------------------------------------|----------------------------------------------------------------------------------------------------------------|-------------------------------------------------------------------------------------|
| <b>Time frame: Since the initial planning of the work</b> |                                                                                                                                                                                |                                                                                                                |                                                                                     |
| 1                                                         | All support for the present manuscript (e.g., funding, provision of study materials, medical writing, article processing charges, etc.)<br><b>No time limit for this item.</b> | This study was funded by Johnson & Johnson (JnJ) for the conduct of literature search and statistical analysis | Payments were made to ClinChoice Inc. where Raymark and Stephen are employed.       |
|                                                           |                                                                                                                                                                                |                                                                                                                |                                                                                     |
|                                                           |                                                                                                                                                                                |                                                                                                                |                                                                                     |
|                                                           |                                                                                                                                                                                |                                                                                                                |                                                                                     |
|                                                           |                                                                                                                                                                                |                                                                                                                |                                                                                     |
|                                                           |                                                                                                                                                                                |                                                                                                                |                                                                                     |
| <b>Time frame: past 36 months</b>                         |                                                                                                                                                                                |                                                                                                                |                                                                                     |
| 2                                                         | Grants or contracts from any entity (if not indicated in item #1 above).                                                                                                       | <b>X None</b>                                                                                                  |                                                                                     |
|                                                           |                                                                                                                                                                                |                                                                                                                |                                                                                     |
| 3                                                         | Royalties or licenses                                                                                                                                                          | <b>X None</b>                                                                                                  |                                                                                     |
|                                                           |                                                                                                                                                                                |                                                                                                                |                                                                                     |
| 4                                                         | Consulting fees                                                                                                                                                                | <b>X None</b>                                                                                                  |                                                                                     |

|    |                                                                                                              |               |  |
|----|--------------------------------------------------------------------------------------------------------------|---------------|--|
|    |                                                                                                              |               |  |
| 5  | Payment or honoraria for lectures, presentations, speakers bureaus, manuscript writing or educational events | <b>X None</b> |  |
| 6  | Payment for expert testimony                                                                                 | <b>X None</b> |  |
| 7  | Support for attending meetings and/or travel                                                                 | <b>X None</b> |  |
| 8  | Patents planned, issued or pending                                                                           | <b>X None</b> |  |
| 9  | Participation on a Data Safety Monitoring Board or Advisory Board                                            | <b>X None</b> |  |
| 10 | Leadership or fiduciary role in other board, society, committee or advocacy group, paid or unpaid            | <b>X None</b> |  |
| 11 | Stock or stock options                                                                                       | <b>X None</b> |  |
| 12 | Receipt of equipment, materials, drugs, medical writing, gifts or other services                             | <b>X None</b> |  |
| 13 | Other financial or non-financial interests                                                                   | <b>X None</b> |  |

**Please summarize the above conflict of interest in the following box:**

This study was funded by Johnson & Johnson (JnJ) for the conduct of literature search and statistical analysis, and payments were made to ClinChoice Inc.

**Please place an “X” next to the following statement to indicate your agreement:**

**X I certify that I have answered every question and have not altered the wording of any of the questions on this form.**

## ICMJE DISCLOSURE FORM

Date: \_\_\_\_\_ 2023/07/11 \_\_\_\_\_  
 Your Name: \_\_\_\_\_ Stephen Patrick Abella \_\_\_\_\_  
 Manuscript Title: \_\_\_\_\_ Surgical stabilization of multiple rib fractures in an Asian population: a systematic literature review and meta-analysis \_\_\_\_\_  
 Manuscript number (if known): \_\_\_\_\_

In the interest of transparency, we ask you to disclose all relationships/activities/interests listed below that are related to the content of your manuscript. "Related" means any relation with for-profit or not-for-profit third parties whose interests may be affected by the content of the manuscript. Disclosure represents a commitment to transparency and does not necessarily indicate a bias. If you are in doubt about whether to list a relationship/activity/interest, it is preferable that you do so.

The following questions apply to the author's relationships/activities/interests as they relate to the current manuscript only.

The author's relationships/activities/interests should be defined broadly. For example, if your manuscript pertains to the epidemiology of hypertension, you should declare all relationships with manufacturers of antihypertensive medication, even if that medication is not mentioned in the manuscript.

In item #1 below, report all support for the work reported in this manuscript without time limit. For all other items, the time frame for disclosure is the past 36 months.

|                                                           |                                                                                                                                                                                | Name all entities with whom you have this relationship or indicate none (add rows as needed)                   | Specifications/Comments (e.g., if payments were made to you or to your institution) |
|-----------------------------------------------------------|--------------------------------------------------------------------------------------------------------------------------------------------------------------------------------|----------------------------------------------------------------------------------------------------------------|-------------------------------------------------------------------------------------|
| <b>Time frame: Since the initial planning of the work</b> |                                                                                                                                                                                |                                                                                                                |                                                                                     |
| 1                                                         | All support for the present manuscript (e.g., funding, provision of study materials, medical writing, article processing charges, etc.)<br><b>No time limit for this item.</b> | This study was funded by Johnson & Johnson (JnJ) for the conduct of literature search and statistical analysis | Payments were made to my institution                                                |
|                                                           |                                                                                                                                                                                |                                                                                                                |                                                                                     |
|                                                           |                                                                                                                                                                                |                                                                                                                |                                                                                     |
|                                                           |                                                                                                                                                                                |                                                                                                                |                                                                                     |
|                                                           |                                                                                                                                                                                |                                                                                                                |                                                                                     |
| <b>Time frame: past 36 months</b>                         |                                                                                                                                                                                |                                                                                                                |                                                                                     |
| 2                                                         | Grants or contracts from any entity (if not indicated in item #1 above).                                                                                                       | <input checked="" type="checkbox"/> None                                                                       |                                                                                     |
|                                                           |                                                                                                                                                                                |                                                                                                                |                                                                                     |
| 3                                                         | Royalties or licenses                                                                                                                                                          | <input checked="" type="checkbox"/> None                                                                       |                                                                                     |
|                                                           |                                                                                                                                                                                |                                                                                                                |                                                                                     |
|                                                           |                                                                                                                                                                                |                                                                                                                |                                                                                     |

|    |                                                                                                              |                                                                                           |  |
|----|--------------------------------------------------------------------------------------------------------------|-------------------------------------------------------------------------------------------|--|
| 4  | Consulting fees                                                                                              | <input checked="" type="checkbox"/> X <input type="checkbox"/> None                       |  |
| 5  | Payment or honoraria for lectures, presentations, speakers bureaus, manuscript writing or educational events | <input checked="" type="checkbox"/> X <input type="checkbox"/> None                       |  |
| 6  | Payment for expert testimony                                                                                 | <input checked="" type="checkbox"/> X <input type="checkbox"/> None                       |  |
| 7  | Support for attending meetings and/or travel                                                                 | <input checked="" type="checkbox"/> X <input type="checkbox"/> None                       |  |
| 8  | Patents planned, issued or pending                                                                           | <input checked="" type="checkbox"/> X <input type="checkbox"/> None                       |  |
| 9  | Participation on a Data Safety Monitoring Board or Advisory Board                                            | <input checked="" type="checkbox"/> X <input type="checkbox"/> None                       |  |
| 10 | Leadership or fiduciary role in other board, society, committee or advocacy group, paid or unpaid            | <input checked="" type="checkbox"/> X <input type="checkbox"/> None                       |  |
| 11 | Stock or stock options                                                                                       | <input checked="" type="checkbox"/> X <input type="checkbox"/> None                       |  |
| 12 | Receipt of equipment, materials, drugs, medical writing, gifts or other services                             | <input checked="" type="checkbox"/> X <input type="checkbox"/> None                       |  |
| 13 | Other financial or non-financial interests                                                                   | Stephen was working with ClinChoice Inc. as a contractor to JnJ at the time of the study. |  |

**Please summarize the above conflict of interest in the following box:**

This study was funded by Johnson & Johnson (JnJ) for the conduct of literature search and statistical analysis, and payments were made to ClinChoice Inc.; Stephen was working with ClinChoice Inc. as a contractor to JnJ at the time of the study.

**Please place an "X" next to the following statement to indicate your agreement:**

**X I certify that I have answered every question and have not altered the wording of any of the questions on this form.**
